# Supplementary material for: Development and usability testing of Understanding Stroke, a tailored life-sustaining treatment decision support tool for stroke surrogate decision makers
Source: Springer Nature journal article supplement (doi:10.1186/s12904-020-00617-x), 2020-07-20
Supplement: MOESM1 [file 18199190]

## Appendix 1

### Focus Group Demographic Data

**Table 1: Providers (n=15)**

| Characteristic                                 | Median (Range) or Count (%) |
|------------------------------------------------|-----------------------------|
| Age                                            | 39 (27-53)                  |
| Gender                                         |                             |
| Male                                           | 5 (33.3)                    |
| Female                                         | 10 (66.7)                   |
| Race                                           |                             |
| American Indian or Alaska Native               | 0 (0)                       |
| Asian or Asian American                        | 1 (6.7)                     |
| Black or African American                      | 0 (0)                       |
| Native Hawaiian or Other Pacific Islander      | 0 (0)                       |
| White or European American                     | 12 (80)                     |
| Other                                          | 0 (0)                       |
| Unknown                                        | 2 (13.3)                    |
| Hispanic or Latino                             |                             |
| Yes                                            | 0 (0)                       |
| No                                             | 15 (100)                    |
| Self-rated Health                              |                             |
| Excellent                                      | 6 (40)                      |
| Very Good                                      | 9 (60)                      |
| Good                                           | 0 (0)                       |
| Fair                                           | 0 (0)                       |
| Poor                                           | 0 (0)                       |
| Years of experience caring for stroke patients |                             |
| 0-5                                            | 3 (20)                      |
| 6-10                                           | 6 (40)                      |
| 11-15                                          | 3 (20)                      |
| >15                                            | 3 (20)                      |
| Primary role in working with stroke patients   |                             |
| Therapist                                      | 5 (33.3)                    |
| Nurse                                          | 1 (6.7)                     |
| Social Worker                                  | 1 (6.7)                     |
| Physician                                      | 8 (53.3)                    |

**Table 2: Stroke survivors and Family Members (n=11)**

| <b>Characteristic</b>                                                                                             | <b>Median (Range) or Count (%)</b> |
|-------------------------------------------------------------------------------------------------------------------|------------------------------------|
| Age                                                                                                               | 62 (49-69)                         |
| Gender                                                                                                            |                                    |
| Male                                                                                                              | 4 (36.4)                           |
| Female                                                                                                            | 7 (63.6)                           |
| Race                                                                                                              |                                    |
| American Indian or Alaska Native                                                                                  | 0 (0)                              |
| Asian or Asian American                                                                                           | 0 (0)                              |
| Black or African American                                                                                         | 1 (9.1)                            |
| Native Hawaiian or Other Pacific Islander                                                                         | 0 (0)                              |
| White or European American                                                                                        | 10 (90.9)                          |
| Other                                                                                                             | 0 (0)                              |
| Unknown                                                                                                           | 0 (0)                              |
| Hispanic or Latino                                                                                                |                                    |
| Yes                                                                                                               | 0 (0)                              |
| No                                                                                                                | 10 (90.0)                          |
| Unknown                                                                                                           | 1 (9.1)                            |
| Self-rated Health                                                                                                 |                                    |
| Excellent                                                                                                         | 3 (27.3)                           |
| Very Good                                                                                                         | 2 (18.2)                           |
| Good                                                                                                              | 4 (36.4)                           |
| Fair                                                                                                              | 1 (9.1)                            |
| Poor                                                                                                              | 1 (9.1)                            |
| Health Literacy (single-item assessment:<br>“How confident are you in filling out<br>medical forms by yourself?”) |                                    |
| Not at all (1)                                                                                                    | 0 (0)                              |
| A little bit (2)                                                                                                  | 0 (0)                              |
| Somewhat (3)                                                                                                      | 1 (9.1)                            |
| Quite a bit (4)                                                                                                   | 4 (36.4)                           |
| Extremely (5)                                                                                                     | 6 (54.5)                           |
| Stroke survivor                                                                                                   | 5 (45.5)                           |
| Family member of a stroke survivor or<br>bereaved family member                                                   | 6 (54.5)                           |
